# Supplementary material for: Integral Algorithms to Evaluate TiO2 and N-TiO2 Thin Films’ Cytocompatibility
Source: MDPI journal article supplement (doi:10.3390/ijms232315183), 2022-12-02
Supplement: s1 [file s1]

## Supplementary

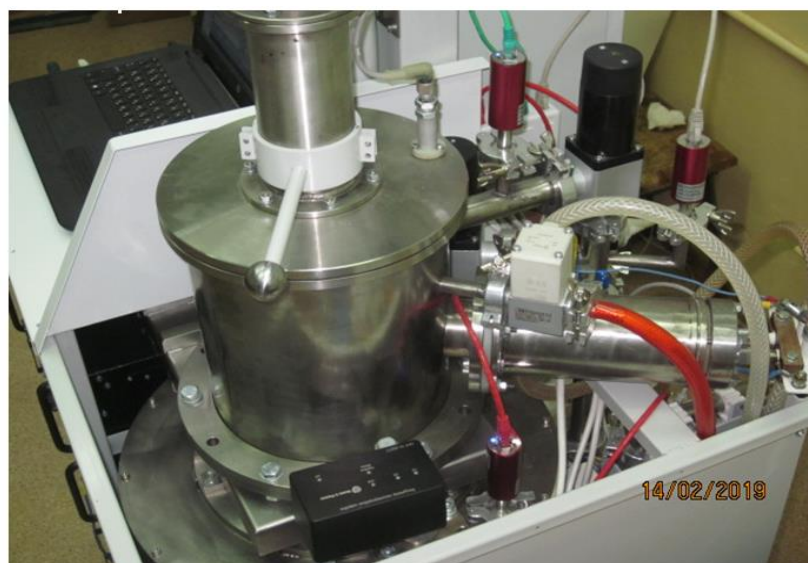

Figure. S1. TION-2M setup used for reactive magnetron sputtering (VIP technologies Ltd., Tomsk, Russia).

Table S1. Statistical significance of differences in direct cytotoxicity after 72-h direct contact with samples

| Direct cytotoxicity, % | No.1  | No.2  | No.3  | No.4  | No.5  | No.6  | No.7  | No.8  | control (NiTi) |
|------------------------|-------|-------|-------|-------|-------|-------|-------|-------|----------------|
| No.1                   |       | 0.000 | 1.000 | 0.000 | 1.000 | 1.000 | 0.060 | 0.090 | 1.000          |
| No.2                   | 0.000 |       | 0.002 | 1.000 | 0.013 | 0.038 | 1.000 | 1.000 | 0.155          |
| No.3                   | 1.000 | 0.002 |       | 0.004 | 1.000 | 1.000 | 0.302 | 0.425 | 1.000          |
| No.4                   | 0.000 | 1.000 | 0.004 |       | 0.025 | 0.068 | 1.000 | 1.000 | 0.260          |
| No.5                   | 1.000 | 0.013 | 1.000 | 0.025 |       | 1.000 | 1.000 | 1.000 | 1.000          |
| No.6                   | 1.000 | 0.038 | 1.000 | 0.068 | 1.000 |       | 1.000 | 1.000 | 1.000          |
| No.7                   | 0.060 | 1.000 | 0.302 | 1.000 | 1.000 | 1.000 |       | 1.000 | 1.000          |
| No.8                   | 0.090 | 1.000 | 0.425 | 1.000 | 1.000 | 1.000 | 1.000 |       | 1.000          |
| control (NiTi)         | 1.000 | 0.155 | 1.000 | 0.260 | 1.000 | 1.000 | 1.000 | 1.000 |                |

Table S2. Statistical significance of differences of cell adhesion after six-day cultivation on sample surfaces

| Adhesion and spreading of cells, cells per mm <sup>2</sup> | No.1  | No.2  | No.3  | No.4  | No.5  | No.6  | No.7  | No.8  | control (NiTi) |
|------------------------------------------------------------|-------|-------|-------|-------|-------|-------|-------|-------|----------------|
| No.1                                                       |       | 0.184 | 1.000 | 0.056 | 1.000 | 1.000 | 0.011 | 0.188 | 1.000          |
| No.2                                                       | 0.184 |       | 1.000 | 1.000 | 1.000 | 0.955 | 1.000 | 1.000 | 0.023          |
| No.3                                                       | 1.000 | 1.000 |       | 1.000 | 1.000 | 1.000 | 0.509 | 1.000 | 1.000          |
| No.4                                                       | 0.056 | 1.000 | 1.000 |       | 1.000 | 0.338 | 1.000 | 1.000 | 0.006          |
| No.5                                                       | 1.000 | 1.000 | 1.000 | 1.000 |       | 1.000 | 0.911 | 1.000 | 1.000          |
| No.6                                                       | 1.000 | 0.955 | 1.000 | 0.338 | 1.000 |       | 0.088 | 0.813 | 1.000          |
| No.7                                                       | 0.011 | 1.000 | 0.509 | 1.000 | 0.911 | 0.088 |       | 1.000 | 0.001          |
| No.8                                                       | 0.188 | 1.000 | 1.000 | 1.000 | 1.000 | 0.813 | 1.000 |       | 0.033          |

|                       |       |       |       |       |       |       |       |       |  |
|-----------------------|-------|-------|-------|-------|-------|-------|-------|-------|--|
| <b>control (NiTi)</b> | 1.000 | 0.023 | 1.000 | 0.006 | 1.000 | 1.000 | 0.001 | 0.033 |  |
|-----------------------|-------|-------|-------|-------|-------|-------|-------|-------|--|

Table S3. Statistical significance of differences of cell viability after six-day cultivation on sample surfaces

| Viability of cells, % | No.1  | No.2  | No.3  | No.4  | No.5  | No.6  | No.7  | No.8  | control (NiTi) |
|-----------------------|-------|-------|-------|-------|-------|-------|-------|-------|----------------|
| <b>No.1</b>           |       | 1.000 | 1.000 | 1.000 | 1.000 | 1.000 | 1.000 | 1.000 | 1.000          |
| <b>No.2</b>           | 1.000 |       | 1.000 | 0.874 | 0.009 | 1.000 | 1.000 | 1.000 | 1.000          |
| <b>No.3</b>           | 1.000 | 1.000 |       | 1.000 | 0.404 | 1.000 | 1.000 | 1.000 | 1.000          |
| <b>No.4</b>           | 1.000 | 0.874 | 1.000 |       | 1.000 | 1.000 | 1.000 | 1.000 | 1.000          |
| <b>No.5</b>           | 1.000 | 0.009 | 0.404 | 1.000 |       | 1.000 | 0.604 | 0.381 | 0.033          |
| <b>No.6</b>           | 1.000 | 1.000 | 1.000 | 1.000 | 1.000 |       | 1.000 | 1.000 | 1.000          |
| <b>No.7</b>           | 1.000 | 1.000 | 1.000 | 1.000 | 0.604 | 1.000 |       | 1.000 | 1.000          |
| <b>No.8</b>           | 1.000 | 1.000 | 1.000 | 1.000 | 0.381 | 1.000 | 1.000 |       | 1.000          |
| <b>control (NiTi)</b> | 1.000 | 1.000 | 1.000 | 1.000 | 0.033 | 1.000 | 1.000 | 1.000 |                |

Table S4. Statistical significance of differences of NO production by endothelial cells within 24 h

| NO $\mu$ M/mL production, | No.1  | No.2  | No.3  | No.4  | No.5  | No.6  | No.7  | No.8  | control (NiTi) |
|---------------------------|-------|-------|-------|-------|-------|-------|-------|-------|----------------|
| <b>No.1</b>               |       | 1.000 | 1.000 | 1.000 | 1.000 | 1.000 | 1.000 | 1.000 | 1.000          |
| <b>No.2</b>               | 1.000 |       | 1.000 | 1.000 | 1.000 | 1.000 | 1.000 | 1.000 | 1.000          |
| <b>No.3</b>               | 1.000 | 1.000 |       | 1.000 | 1.000 | 1.000 | 1.000 | 1.000 | 1.000          |
| <b>No.4</b>               | 1.000 | 1.000 | 1.000 |       | 0.468 | 1.000 | 1.000 | 1.000 | 1.000          |
| <b>No.5</b>               | 1.000 | 1.000 | 1.000 | 0.468 |       | 1.000 | 0.101 | 0.101 | 1.000          |
| <b>No.6</b>               | 1.000 | 1.000 | 1.000 | 1.000 | 1.000 |       | 0.479 | 0.479 | 1.000          |
| <b>No.7</b>               | 1.000 | 1.000 | 1.000 | 1.000 | 0.101 | 0.479 |       | 1.000 | 1.000          |
| <b>No.8</b>               | 1.000 | 1.000 | 1.000 | 1.000 | 0.101 | 0.479 | 1.000 |       | 1.000          |
| <b>control (NiTi)</b>     | 1.000 | 1.000 | 1.000 | 1.000 | 1.000 | 1.000 | 1.000 | 1.000 |                |

Table S5. Scores assigned to each sample in a direct cytotoxicity test

| sample number, (n) | No.1 | No.2 | No.3 | No.4 | No.5 | No.6 | No.7 | No.8 | control (NiTi) |
|--------------------|------|------|------|------|------|------|------|------|----------------|
| 1                  | 0    | 2    | 1    | 2    | 1    | 1    | 1    | 2    | 1              |
| 2                  | 0    | 1    | 0    | 1    | 0    | 0    | 1    | 1    | 0              |
| 3                  | 0    | 2    | 0    | 2    | 0    | 0    | 1    | 1    | 0              |
| 4                  | 0    | 2    | 0    | 1    | 0    | 0    | 1    | 1    | 0              |
| 5                  | 0    | 2    | 0    | 1    | 0    | 0    | 1    | 1    | 0              |
| 6                  | 0    | 2    | 1    | 2    | 0    | 1    | 1    | 1    | 1              |
| Mean               | 0.0  | 1.8  | 0.3  | 1,5  | 0.2  | 0.3  | 1    | 1.2  | 0.3            |
| SD                 | 0.0  | 0.41 | 0.52 | 0.55 | 0.41 | 0.52 | 0.0  | 0.41 | 0.52           |

Table S6. Scores assigned to each sample in cell adhesion test

| sample number,<br>(n) | No.1 | No.2 | No.3 | No.4 | No.5 | No.6 | No.7 | No.8 | control<br>(NiTi) |
|-----------------------|------|------|------|------|------|------|------|------|-------------------|
| 1                     | 0    | 1    | 0    | 2    | 1    | 0    | 2    | 1    | 0                 |
| 2                     | 0    | 2    | 1    | 2    | 1    | 0    | 2    | 2    | 0                 |
| 3                     | 0    | 2    | 1    | 2    | 1    | 0    | 2    | 1    | 0                 |
| 4                     | 0    | 1    | 1    | 2    | 1    | 1    | 2    | 1    | 0                 |
| 5                     | 0    | 2    |      | 2    | 1    |      |      |      | 0                 |
| Mean                  | 0    | 1.6  | 0.8  | 2    | 1    | 0.3  | 2    | 1.3  | 0                 |
| SD                    | 0    | 0.55 | 0.50 | 0    | 0    | 0.50 | 0    | 0.50 | 0                 |

Table S7. Scores assigned to each sample in the viability test

| sample number,<br>(n) | No.1 | No.2 | No.3 | No.4 | No.5 | No.6 | No.7 | No.8 | control<br>(NiTi) |
|-----------------------|------|------|------|------|------|------|------|------|-------------------|
| 1                     | 2    | 1    | 0    | 2    | 2    | 2    | 1    | 1    | 0                 |
| 2                     | 2    | 1    | 1    | 1    | 2    | 1    | 1    | 2    | 0                 |
| 3                     | 1    | 0    | 1    | 1    | 2    | 1    | 1    | 0    | 0                 |
| 4                     | 0    | 0    | 1    | 2    | 2    | 1    | 1    | 0    | 2                 |
| 5                     | 1    | 0    | 1    | 1    | 2    | 1    | 1    | 0    | 2                 |
| 6                     | 2    | 1    |      |      |      |      | 0    |      | 0                 |
| 7                     |      |      |      |      |      |      |      |      | 1                 |
| Mean                  | 1.3  | 0.5  | 0.8  | 1.4  | 2    | 1.2  | 0.8  | 0.6  | 0.7               |
| SD                    | 0.82 | 0.55 | 0.45 | 0.55 | 0    | 0.45 | 0.45 | 0.89 | 1.0               |

Table S8. Scores assigned to each sample in the nitric oxide (NO) production test

| sample number,<br>(n) | No.1 | No.2 | No.3 | No.4 | No.5 | No.6 | No.7 | No.8 | control<br>(NiTi) |
|-----------------------|------|------|------|------|------|------|------|------|-------------------|
| 1                     | 1    | 0    | 1    | 1    | 0    | 0    | 2    | 2    | 0                 |
| 2                     | 0    | 0    | 1    | 1    | 0    | 0    | 2    | 2    | 1                 |
| 3                     | 0    | 0    | 1    | 2    | 0    | 0    | 2    | 2    | 0                 |
| 4                     | 0    | 0    | 1    | 1    | 0    | 0    | 2    | 2    | 0                 |
| 5                     | 0    | 0    | 1    | 2    | 0    | 0    | 2    | 2    | 1                 |
| 6                     | 1    | 1    | 1    | 1    | 0    | 0    | 2    | 2    | 1                 |
| Mean                  | 0.3  | 0    | 1    | 1.3  | 0    | 0    | 2    | 2    | 0.5               |
| SD                    | 0.52 | 0    | 0    | 0.52 | 0    | 0    | 0    | 0    | 0.55              |

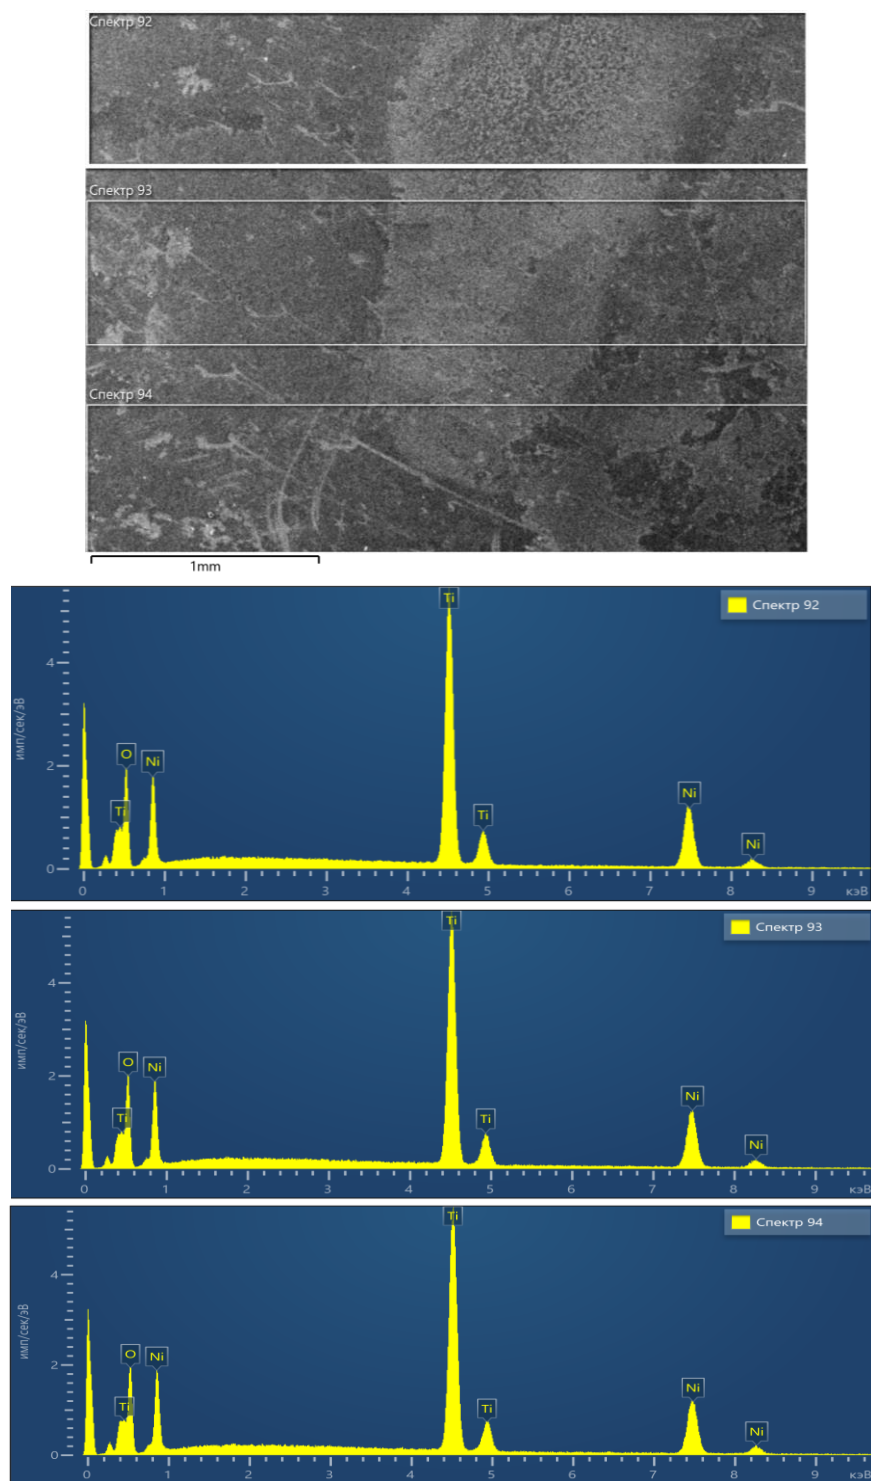

Figure S2. EDS analysis. Three spots selected on the surface of the sample No.1 (top image) and 3 element spectra obtained from these fields.
